# Supplementary material
Source: PubMed Central journal article supplement (PMC3368129)
Supplement: mmc1.pdf [file mmc1.pdf]

# Stochastic 16-State Model of Voltage Gating of Gap-Junction Channels Enclosing Fast and Slow Gates

Nerijus Paulauskas,<sup>†¶</sup> Henrikas Pranevicius,<sup>‡</sup> Jonas Mockus,<sup>§</sup> and Feliksas F. Bukauskas<sup>†</sup>

<sup>†</sup>Dominick P. Purpura Department of Neuroscience, Albert Einstein College of Medicine, New York, New York; <sup>‡</sup>Department of Business Informatics, Kaunas University of Technology, Kaunas, Lithuania; <sup>§</sup>Department of Systems Analysis, Institute of Mathematics and Informatics, Vilnius University, Vilnius, Lithuania; and <sup>¶</sup>Institute of Cardiology, Lithuanian University of Health Sciences, Kaunas, Lithuania

## Supporting Material

**Figures S1-S3:**

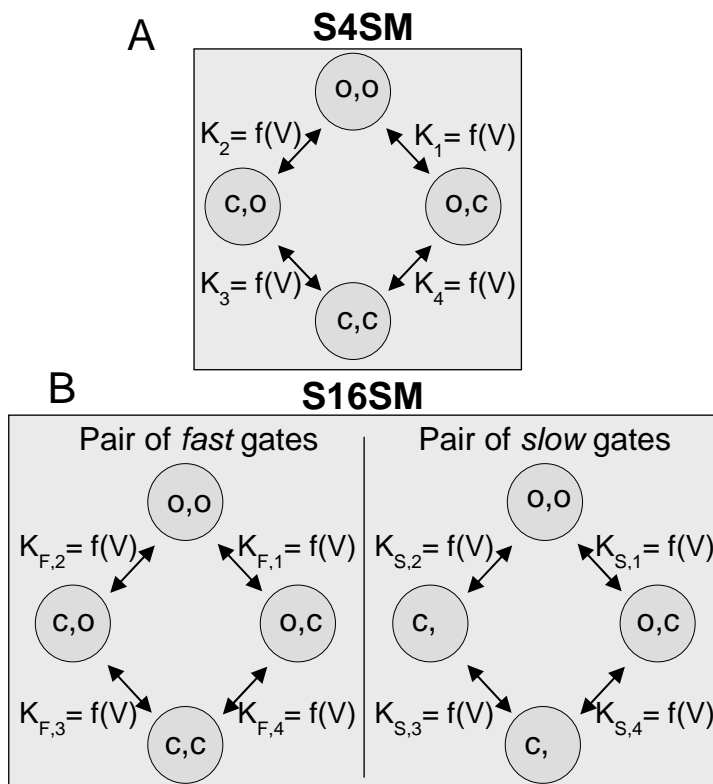

**Fig. S1.** Schematics of the channel states in four- (A) and 16- (B) state voltage-gating models of GJs.

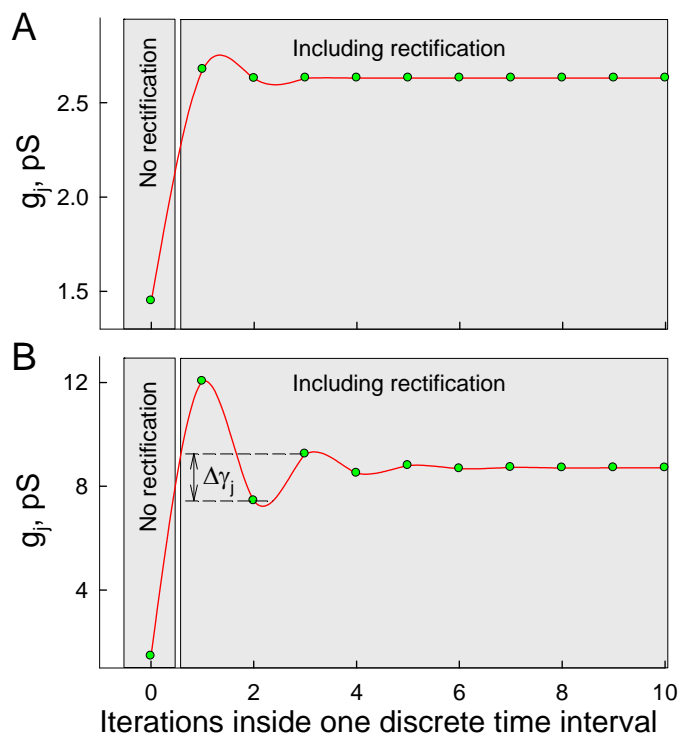

**Fig. S2.** Dependence of the single GJ channel conductance,  $\gamma_j$ , on the number of iterations used to evaluate an effect of I/V rectification on  $\gamma_{F,open}$ ,  $\gamma_{F,res}$  and  $\gamma_{S,open}$  in a simulated Cx45 GJ channel (Table S3). Iterations were performed inside a discrete time interval. (A) Initially, one *fast* gate was closed ( $\gamma_{F,res}=1.5$  pS) while

both *slow* gates and one *fast* gate were open ( $\gamma_{F,open} = \gamma_{S,open}=128$  pS) and the GJ channel was exposed to  $V_j=100$  mV. Rectification coefficients were as follows:  $R_{F,res}=150$  mV,  $R_{F,open} = R_{S,open}=1000$  mV. In the first step, voltages were calculated across each gate ( $V_{GS}$ ) assuming an absence of I/V rectification. Then, using these voltages, gate conductances were recalculated accounting for their rectification to evaluate a new set of  $V_{GS}$ . We repeated this cycle 10 times, and evaluated  $\gamma_j$  as well as differences,  $\Delta\gamma_{j,n}=\gamma_{j,n+1}-\gamma_{j,n}$ , in each cycle. **(B)** All parameters were the same as in **(A)**, except  $R_{F,res}=40$  mV, which is too low and practically never occurs. Given examples illustrate that the steady state of  $\gamma_j$  was approached after approximately 4 cycles in **(A)** and 7 cycles in **(B)**. In a S16SM, to avoid an infinite loop, we defined the tolerance criterion  $e=\gamma_{j,o}/10,000$  and, at  $\Delta\gamma_j < e$ , the final values of  $V_{GS}$  were estimated, allowing for the evaluation of possible changes in the state of each gate. Finally, the information about the new set of states for all gates is transferred to the next discrete time interval and the process iteratively repeated.

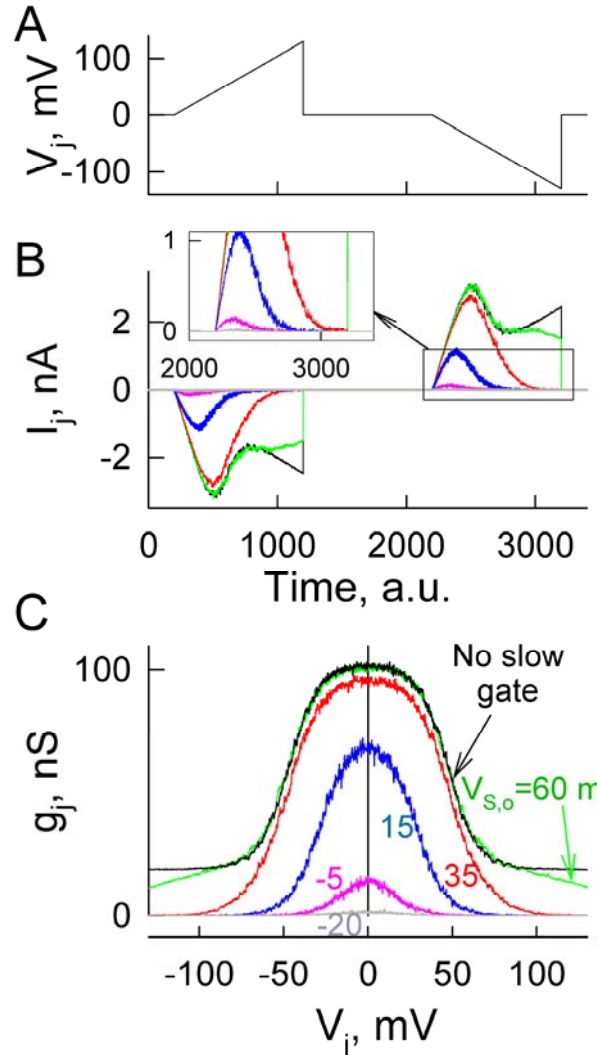

**Fig. S3.** Illustrates how an addition of the *slow* gate to an already present *fast* gate affects  $g_j$ - $V_j$  plots obtained using slow  $V_j$  ramps **(A)**. Simulated junction containing 1000 channels. Values of parameters are shown in Table S1.  $I_j$  and  $g_j$  traces in different colors were obtained at  $V_{S,o}$  equal to 60, 35, 15, -5 and -20 mV;  $I_j$  trace **(B)** and  $g_j$ - $V_j$  plot shown in black **(C)** were obtained when the operation of the *slow* gate was fully inactivated. Presented data show that a gradual reduction in  $V_{S,o}$  decreases  $g_{min}$  to zero, narrows  $g_j$ - $V_j$  plot and finally leads to full uncoupling at  $V_{S,o}$ s below -20 mV. Thus, the presented example shows that an increase in sensitivity to  $V_j$  of the *slow* gate can reduce  $g_{min}$  and lead to full uncoupling even at constant parameters of the fast gate. In the a S4SM, containing only two fast gates, a decay of  $g_{min}$  can be caused only by reducing  $\gamma_{F,res}$ .

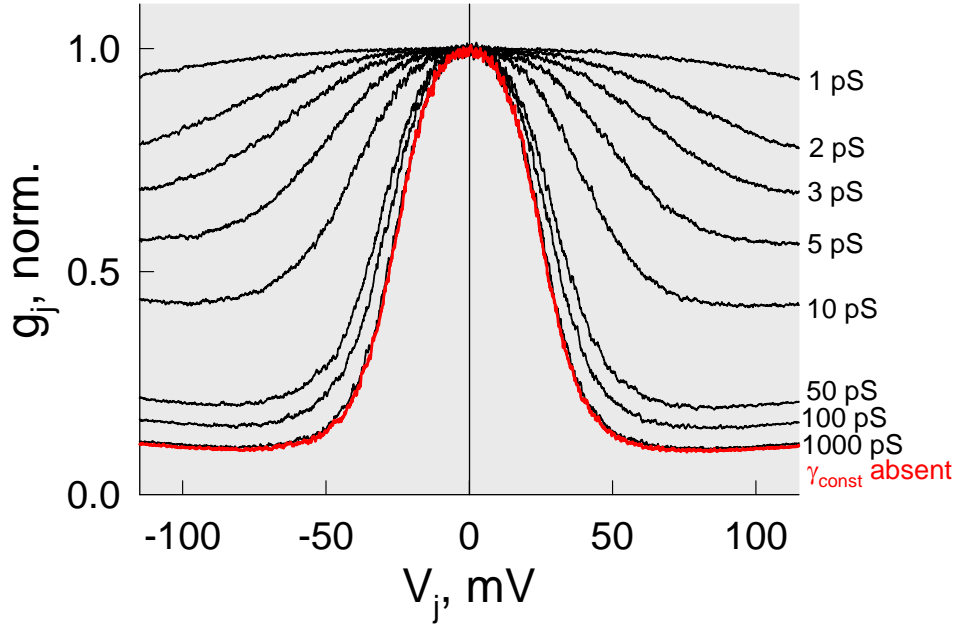

**Fig. S4.** A family of simulated and normalized  $g_j$ - $V_j$  plots obtained using a S16SM and parameters of Cx45 homotypic GJs shown in **Table S3**; 5000 GJ channels were operating. In the absence of non-gated conductance ( $\gamma_{\text{const}} \rightarrow \infty$ ), the  $g_j$ - $V_j$  plot is in red. Under a decrease of  $\gamma_{\text{const}}$  from 1000 to 1 pS,  $g_j$ - $V_j$  plots become less sensitive to  $V_j$ . Together,  $g_{\text{min}}$  increases, which is due to relatively greater decrease of  $\gamma_{\text{open}}$  than  $\gamma_{\text{res}}$  of the GJ channel.

### Tables S1-S5:

**Table S1.** Parameters of *fast* and *slow* gates used to simulate voltage-gating shown in Figs. 2.

| Parameters of gates                                       | <i>Fast gate</i> | <i>Slow gate</i> |
|-----------------------------------------------------------|------------------|------------------|
| $A_F$ & $A_S$ , $\text{mV}^{-1}$                          | 0.11             | 0.09             |
| $V_{F,o}$ & $V_{S,o}$ , mV                                | 25               | 60               |
| $\gamma_{F,\text{open}}$ & $\gamma_{S,\text{open}}$ , pS  | 440              | 440              |
| $R_{F,\text{open}}$ & $R_{S,\text{open}}$ , mV            | 800              | 800              |
| $\gamma_{F,\text{res}}$ & $\gamma_{S,\text{closed}}$ , pS | 25.9             | -                |
| $R_{F,\text{res}}$ & $R_{S,\text{closed}}$ , mV           | 300              | -                |

**Table S2.** Initial range of variable parameters used to fit  $g_j$ - $V_j$  plot of Cx45 homotypic GJs shown in Fig. 5A and their preliminary/initial estimates.

| <b>Parameters of gates</b>                  | <b>Fast gate; initial range of parameters</b> | <b>Slow gate; initial range of parameters</b> | <b>Fast gate; initial estimates</b> | <b>Slow gate; initial estimates</b> |
|---------------------------------------------|-----------------------------------------------|-----------------------------------------------|-------------------------------------|-------------------------------------|
| $A_F$ & $A_S$ , $mV^{-1}$                   | 0.08 ÷ 0.14                                   | 0.06 ÷ 0.12                                   | 0.14                                | 0.109                               |
| $V_{F,o}$ & $V_{S,o}$ , mV                  | -20 ÷ 40                                      | 40 ÷ 100                                      | 12.9                                | 88                                  |
| $\gamma_{F,open}$ & $\gamma_{S,open}$ , pS  | 128                                           | 128                                           | 128                                 | 128                                 |
| $R_{F,open}$ & $R_{S,open}$ mV              | 1000                                          | 1000                                          | 1000                                | 1000                                |
| $\gamma_{F,res}$ & $\gamma_{S,closed}$ , pS | 1 ÷ 10                                        | 0                                             | 1.36                                | 0                                   |
| $R_{F,res}$ & $R_{S,closed}$ , mV           | 100 ÷ 300                                     | -                                             | 159                                 | -                                   |

**Table S3.** The final estimates of gating parameters of Cx45 GJs from  $g_j$ - $V_j$  plot shown in Fig. 5A.

| <b>Parameters of gates</b>                  | <b>Fast gate, hemich. A</b> | <b>Slow gate, hemich. A</b> | <b>Fast gate, hemich. B</b> | <b>Slow gate, hemich. B</b> |
|---------------------------------------------|-----------------------------|-----------------------------|-----------------------------|-----------------------------|
| $A_F$ & $A_S$ , $mV^{-1}$                   | 0.14                        | 0.11                        | 0.15                        | 0.11                        |
| $V_{F,o}$ & $V_{S,o}$ , mV                  | 13.4                        | 88                          | 13.7                        | 84.9                        |
| $\gamma_{F,open}$ & $\gamma_{S,open}$ , pS  | 128                         | 128                         | 128                         | 128                         |
| $R_{F,open}$ & $R_{S,open}$ mV              | 1000                        | 1000                        | 1000                        | 1000                        |
| $\gamma_{F,res}$ & $\gamma_{S,closed}$ , pS | 1.5                         | 0                           | 1.49                        | 0                           |
| $R_{F,res}$ & $R_{S,closed}$ , mV           | 151                         | -                           | 140                         | -                           |

**Table S4.** The estimates of gating parameters of Cx43-EGFP/Cx45 GJs obtained from global optimization of experimental  $g_j$ - $V_j$  plot shown in Fig. 5C.

| <b>Parameters of gates</b>                  | <b>Fast gate Cx45</b> | <b>Slow gate Cx45</b> | <b>Fast gate Cx43-EGFP</b> | <b>Slow gate Cx43-EGFP</b> |
|---------------------------------------------|-----------------------|-----------------------|----------------------------|----------------------------|
| $A_F$ & $A_S$ , $mV^{-1}$                   | 0.16                  | 0.18                  | 0.1                        | 0.067                      |
| $V_{F,o}$ & $V_{S,o}$ , mV                  | 2.1                   | 61                    | 40                         | 48.7                       |
| $\gamma_{F,open}$ & $\gamma_{S,open}$ , pS  | 128                   | 128                   | 440                        | 440                        |
| $R_{F,open}$ & $R_{S,open}$ mV              | 1000                  | 1000                  | 1000                       | 1000                       |
| $\gamma_{F,res}$ & $\gamma_{S,closed}$ , pS | 0.42                  | 0                     | 440                        | 0                          |
| $R_{F,res}$ & $R_{S,closed}$ , mV           | 109.8                 | -                     | -                          | -                          |

**Table S5.** Gating parameters used for simulation of  $g_{j,ss}$ - $V_j$  plots shown in Fig. S3.

| <b>Parameters</b>                           | <b>Fast gate</b> | <b>Slow gate</b>      |
|---------------------------------------------|------------------|-----------------------|
| $A_F$ & $A_S$ , $mV^{-1}$                   | 0.1              | 0.06                  |
| $V_{F,o}$ & $V_{S,o}$ , mV                  | 20               | 60, 35, 15, -5 or -20 |
| $\gamma_{F,open}$ & $\gamma_{S,open}$ , pS  | 400              | 400                   |
| $R_{F,open}$ & $R_{S,open}$ mV              | 1000             | 1000                  |
| $\gamma_{F,res}$ & $\gamma_{S,closed}$ , pS | 23               | 0                     |
| $R_{F,res}$ & $R_{S,closed}$ , mV           | 1000             | -                     |

## Legends to Movies 1-3.

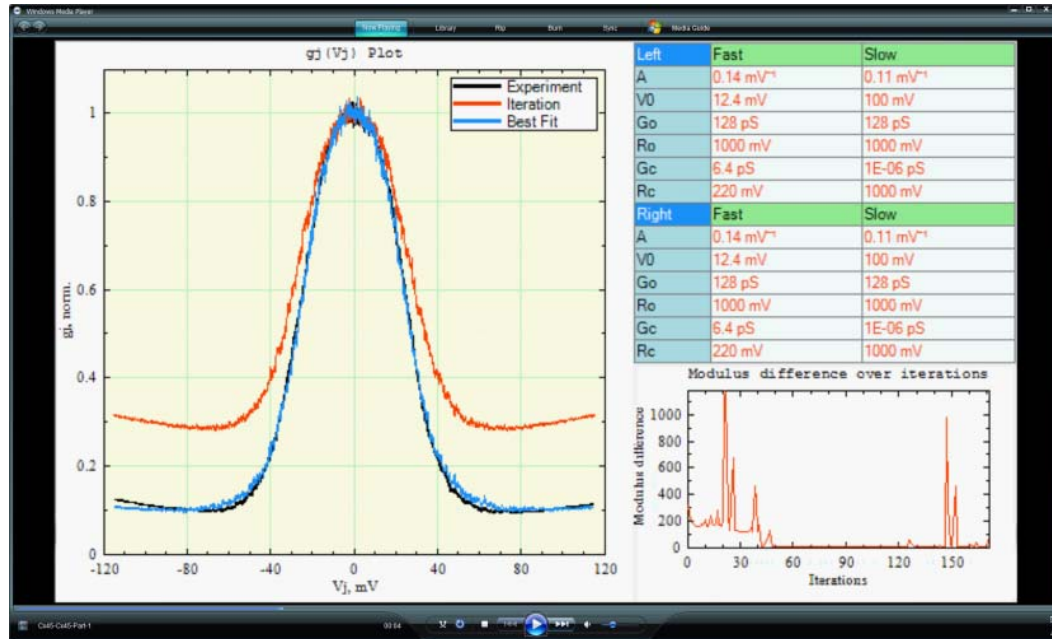

**Movie 1.** Illustration of coarse global optimization of gating parameters of Cx45 homotypic gap junction channels from experimental  $g_{j,ss}$ - $V_j$  dependence (black) assuming that parameters of *fast* and *slow* gates in both hemichannels are identical. **A single frame** from the movie is shown above. Simulated  $g_{j,ss}$ - $V_j$  plots are shown in red. The  $g_{j,ss}$ - $V_j$  plot (blue) shows intermediate best fits that gradually approach the experimental  $g_{j,ss}$ - $V_j$  plot (black). The table and numbers on the right show changes of individual parameters during global optimization. The plot on the bottom-right shows the dynamics of modulus difference between simulated and experimental  $g_{j,ss}$ - $V_j$  plots during global optimization.

**Movie 2.** Illustration of ‘final’ global optimization of gating parameters of Cx45 homotypic gap junction channels from experimental  $g_{j,ss}$ - $V_j$  dependence (black) assuming that parameters of *fast* and *slow* gates in both hemichannels differ. Simulated  $g_{j,ss}$ - $V_j$  plots (red) and comprise 950 iterations. The  $g_{j,ss}$ - $V_j$  plot (blue) shows intermediate best fits that gradually approach the final  $g_{j,ss}$ - $V_j$  plot. The ‘final’ global optimization starts with gating parameters obtained during the ‘coarse’ global optimization. The table and numbers on the right show changes of individual parameters during global optimization. The plot on the bottom-right shows dynamics of modulus difference between simulated and experimental  $g_{j,ss}$ - $V_j$  plots during global optimization.

**Movie 3.** Illustration of global optimization of gating parameters of Cx43-EGFP/Cx45 heterotypic gap junction channels from experimental  $g_{j,ss}$ - $V_j$  dependence (black) assuming that parameters of *fast* and *slow* gates in both hemichannels differ. Simulated  $g_{j,ss}$ - $V_j$  plots (red) comprise 1680 iterations. The  $g_{j,ss}$ - $V_j$  plot (blue) shows intermediate best fits that gradually approach the final  $g_{j,ss}$ - $V_j$  plot. The table and numbers on the right show changes of individual parameters during global optimization. The plot on the bottom-right shows dynamics of modulus difference between simulated and experimental  $g_{j,ss}$ - $V_j$  plots during global optimization.
